# Supplementary material for: Taking a machine learning approach to optimize prediction of vaccine hesitancy in high income countries
Source: PubMed Central journal article supplement (PMC8827083; doi:10.1038/s41598-022-05915-3), 2022-02-08
Supplement: 41598_2022_5915_MOESM1_ESM.pdf [file 41598_2022_5915_MOESM1_ESM.pdf]

Taking a machine learning approach to optimize prediction of vaccine hesitancy in high income countries.

Tania M. Lincoln\*, Björn Schlier, Felix Strakeljahn, Brandon A. Gaudiano, Suzanne H. So, Jessica Kingston, Eric Morris, Lyn Ellett.

## **Supplement 1. Extended information on questionnaires.**

### **Items of the COVID-19 adapted version of the 7-item Vaccine Conspiracy Beliefs Scale:**

- Vaccine safety data for COVID-19 is faked;
- Immunizing children and other vulnerable groups is harmful and this fact is covered up;
- Pharmaceutical companies are covering up the dangers of COVID-19 vaccines;
- People are lied to about COVID-19 vaccine effectiveness;
- Vaccine effectiveness data is probably faked;
- People are lied to about vaccine safety;
- The government are trying to cover up links between the vaccines being tested and serious health problems

**Table S1***Extended overview of predictors with scoring, as well as example items, Cronbach's alpha by site*

| Variable                      | Scoring                                          | Assessment/sample item                                                                           | Reliability by site (Cronbach's $\alpha$ ) |     |     |     |    |
|-------------------------------|--------------------------------------------------|--------------------------------------------------------------------------------------------------|--------------------------------------------|-----|-----|-----|----|
|                               |                                                  |                                                                                                  | UK                                         | USA | AUS | GER | HK |
| <i>Socio-demographic data</i> |                                                  |                                                                                                  |                                            |     |     |     |    |
| Age                           | Age in years                                     | 1 item: "What is your Age?"-                                                                     | -                                          | -   | -   | -   | -  |
| Gender                        | 0="male", 1="female"                             | 2 items (sex at birth, current gender), dichotomized                                             | -                                          | -   | -   | -   | -  |
| Size of current home city     | (1="<100,000 people", 6=">10 million people")    | 1 item: "How large is the population size of your city?"                                         | -                                          | -   | -   | -   | -  |
| Educational level             | 0="≥A-level", 1=primary/secondary                | 1 item "What is your highest educational degree?" (6 options, dichotomized)                      | -                                          | -   | -   | -   | -  |
| Annual income                 | 1="Under £18,500", 7="more than £112,000"        | 1 item: "What is the average yearly income of your household?"                                   | -                                          | -   | -   | -   | -  |
| Employment status             | 0="currently working", 1="currently not working" | 1 item: "What was your usual employment pattern during the past year?" (9 options, dichotomized) | -                                          | -   | -   | -   | -  |

|                                      |                              |                                                                                                                                                                                                            |      |      |      |      |      |
|--------------------------------------|------------------------------|------------------------------------------------------------------------------------------------------------------------------------------------------------------------------------------------------------|------|------|------|------|------|
| Migrant status                       | 0="no", 1="yes"              | 1 item: "Do you currently live in the same country as you were born in?"                                                                                                                                   | -    | -    | -    | -    | -    |
| Minority status                      | 0="no", 1="yes"              | At least one of 5 minority status questions answered with yes                                                                                                                                              | -    | -    | -    | -    | -    |
| Number of minority group memberships | Sum-score, range 0-5         | 5 yes/no-questions on minority group membership (e.g., ethnic minority)                                                                                                                                    | -    | -    | -    | -    | -    |
| Mental health diagnosis              | 0="yes", 1="no"              | 1 item: "Do you have any current psychiatric diagnosis?"                                                                                                                                                   | -    | -    | -    | -    | -    |
| <i>Perception of COVID risk</i>      |                              |                                                                                                                                                                                                            |      |      |      |      |      |
| COVID anxiety                        | Range: 0% - 100%             | 1 item: "How anxious are you about the coronavirus COVID-19 pandemic?"                                                                                                                                     | -    | -    | -    | -    | -    |
| Close people have been infected      | 0="no", 1="yes"              | 1 item: "Has someone close to you been infected by the coronavirus COVID-19?"                                                                                                                              | -    | -    | -    | -    | -    |
| Perceived risk of infection          | Mean-score, range: 0% - 100% | 3 identical questions for different time-frames, e.g., "What do you think is your personal percentage risk of being infected with the COVID-19 virus over the following time periods? - In the next month" | 0.93 | 0.92 | 0.97 | 0.95 | 0.94 |

|                                    |                                                        |                                                                                                                                                                                                                          |      |      |      |      |      |
|------------------------------------|--------------------------------------------------------|--------------------------------------------------------------------------------------------------------------------------------------------------------------------------------------------------------------------------|------|------|------|------|------|
| Expected consequences of infection | Mean-score, range: 0 (not at all bad) – 100 (very bad) | Mean-score of 3 identical questions for different time-frames, e.g., “How bad do you think would be the consequences of you being infected with the COVID-19 virus over the following time periods? - In the next month” | 0.96 | 0.96 | 0.97 | 0.97 | 0.96 |
|------------------------------------|--------------------------------------------------------|--------------------------------------------------------------------------------------------------------------------------------------------------------------------------------------------------------------------------|------|------|------|------|------|

---

*Political mindedness*

|                                                                   |                                                                          |                                                                                                                               |   |   |   |   |   |
|-------------------------------------------------------------------|--------------------------------------------------------------------------|-------------------------------------------------------------------------------------------------------------------------------|---|---|---|---|---|
| Political orientation (higher values=more right-wing orientation) | (higher 1=“Very left wing/ liberal” , 7= “Very right wing/conservative”) | 1 item: “Where do you feel your political views lie on a spectrum of left wing (or liberal) to right wing (or conservative)?” | - | - | - | - | - |
|-------------------------------------------------------------------|--------------------------------------------------------------------------|-------------------------------------------------------------------------------------------------------------------------------|---|---|---|---|---|

|                                                                    |                                                                                     |                                                                    |   |   |   |   |   |
|--------------------------------------------------------------------|-------------------------------------------------------------------------------------|--------------------------------------------------------------------|---|---|---|---|---|
| Preferred sources of information (higher values=more social media) | 1= “Always from major newspapers and/or TV channels”, 5= “Always from social media” | 1 item: “How do you find out about what is going on in the world?” | - | - | - | - | - |
|--------------------------------------------------------------------|-------------------------------------------------------------------------------------|--------------------------------------------------------------------|---|---|---|---|---|

*Specific Mistrust*

|                                   |                            |                                                                         |      |      |      |      |      |
|-----------------------------------|----------------------------|-------------------------------------------------------------------------|------|------|------|------|------|
| Pandemic persecutory threat (PPS) | factor-score, range 0-51.2 | 15 items, e.g., “I was sure someone wanted to infect me with COVID-19.” | 0.97 | 0.98 | 0.98 | 0.95 | 0.97 |
|-----------------------------------|----------------------------|-------------------------------------------------------------------------|------|------|------|------|------|

|                                    |                            |                                                                |      |      |      |      |      |
|------------------------------------|----------------------------|----------------------------------------------------------------|------|------|------|------|------|
| Pandemic paranoid conspiracy (PPS) | factor-score, range 0-20.1 | 6 items, e.g., “The government is lying to us about COVID-19.” | 0.93 | 0.94 | 0.94 | 0.93 | 0.92 |
|------------------------------------|----------------------------|----------------------------------------------------------------|------|------|------|------|------|

---

|                                                                     |                       |                                                                                            |      |      |      |      |      |
|---------------------------------------------------------------------|-----------------------|--------------------------------------------------------------------------------------------|------|------|------|------|------|
| Pandemic interpersonal mistrust factor-score, range 0-11.9<br>(PPS) |                       | 4 items, e.g., “I can’t trust others to stick to the social distancing rules”              | 0.85 | 0.85 | 0.83 | 0.84 | 0.80 |
| Pandemic paranoia global score factor-score, range 0-65.1<br>(PPS)  |                       | 25 items (weighted sum of prior three PPS variables)                                       | 0.94 | 0.96 | 0.97 | 0.93 | 0.95 |
| Vaccine conspiracy beliefs                                          | Sum-score, range 7-49 | 7 items, e.g., “Vaccine safety data for COVID-19 is faked”                                 | 0.98 | 0.97 | 0.97 | 0.97 | 0.95 |
| <i>General mistrust</i>                                             |                       |                                                                                            |      |      |      |      |      |
| Ideas of reference (RGPTS)                                          | Sum-score, range 0-32 | 8 items, e.g., “I spent time thinking about friends gossiping about me”                    | 0.95 | 0.94 | 0.92 | 0.94 | 0.91 |
| Paranoid ideation (RGPTS)                                           | Sum-score, range 0-40 | 5 items, e.g., “I was sure someone wanted to hurt me.”                                     | 0.96 | 0.96 | 0.95 | 0.95 | 0.96 |
| General conspiracy mentality<br>(CMQ)                               | Sum-score, range 5-55 | 5 items, e.g., “there are secret organizations that greatly influence political decisions” | 0.88 | 0.91 | 0.89 | 0.91 | 0.87 |
| <i>Social adversity</i>                                             |                       |                                                                                            |      |      |      |      |      |
| Traumatic emotional neglect                                         | 0=no, 1=yes           | 1 item: “Did you ever experience any kind of emotional neglect?”                           | -    | -    | -    | -    | -    |

|                                      |                        |                                                                    |      |      |      |      |      |
|--------------------------------------|------------------------|--------------------------------------------------------------------|------|------|------|------|------|
| Traumatic psychological abuse        | 0=no, 1=yes            | 1 item: “Did you ever experience any kind of psychological abuse?” | -    | -    | -    | -    | -    |
| Traumatic physical abuse             | 0=no, 1=yes            | 1 item: “Did you ever experience any kind of physical abuse?”      | -    | -    | -    | -    | -    |
| Traumatic sexual abuse               | 0=no, 1=yes            | 1 item: “Were you ever approached sexually against your will?”     | -    | -    | -    | -    | -    |
| <i>Generalized beliefs</i>           |                        |                                                                    |      |      |      |      |      |
| Negative beliefs about self (BCSS)   | Sum-score, range 0-24  | 6 items, e.g., “I am unloved”                                      | 0.84 | 0.86 | 0.84 | 0.86 | 0.87 |
| Negative beliefs about others (BCSS) | Sum-score, range 0-24  | 6 items, e.g., “I am valuable”                                     | 0.90 | 0.91 | 0.90 | 0.87 | 0.91 |
| Positive beliefs about self (BCSS)   | Sum-score, range 0-24  | 6 items, e.g., “Other people are bad”                              | 0.86 | 0.88 | 0.86 | 0.86 | 0.87 |
| Positive beliefs about others (BCSS) | Sum-score, range 0-24  | 6 items, e.g., “Other people are trustworthy”                      | 0.91 | 0.92 | 0.89 | 0.85 | 0.91 |
| Perceived social rank (SCS)          | Mean-score, range 1-10 | 11 semantic differentials, e.g., “Inferior:Superior”               | 0.94 | 0.95 | 0.95 | 0.94 | 0.94 |

Note: PPS = Pandemic Paranoia Scale; CMQ = Conspiracy Mentality Questionnaire; RGTPS = Revised Green Paranoid Thoughts Scale; Scale; BCSS = Brief Core Schema Scales; SCS = Social Comparison Scale.

## Supplement 2. Correlation analysis by site

**Table S2.**

*Point-biserial correlation between predictors and vaccine willingness in the total sample and within each site*

|                                                                          | Total<br>sample | UK             | USA            | Australia      | Germany         | HK             | Total effect<br>replicated in<br>X subsamples |
|--------------------------------------------------------------------------|-----------------|----------------|----------------|----------------|-----------------|----------------|-----------------------------------------------|
| <i>Socio-demographic data</i>                                            |                 |                |                |                |                 |                |                                               |
| Age                                                                      | <b>0.17***</b>  | <b>0.22***</b> | <b>0.17***</b> | 0.08           | <b>0.18***</b>  | <b>0.28***</b> | 4                                             |
| Gender (0=male, 1=female) <sup>a</sup>                                   | <b>-0.13***</b> | <b>-0.12**</b> | <b>-0.15**</b> | <b>-0.10*</b>  | <b>-0.16***</b> | <b>-0.12*</b>  | 5                                             |
| Size of current home city                                                | <b>-0.07**</b>  | <b>-0.13**</b> | <b>0.17***</b> | 0.09           | 0.04            | 0.02           | 1                                             |
| Educational level<br>(0="≥A-level",<br>1=primary/secondary) <sup>b</sup> | <b>-0.10***</b> | -0.01          | <b>-0.09*</b>  | -0.07          | <b>-0.16***</b> | <b>-0.12*</b>  | 3                                             |
| Annual income                                                            | <b>0.13***</b>  | 0.08           | <b>0.29***</b> | <b>0.20***</b> | <b>0.15**</b>   | 0.08           | 3                                             |
| Employment status (0="working", 1="not working")                         | -0.04           | -0.06          | 0.02           | <b>-0.12*</b>  | -0.08           | -0.09          | -                                             |
| Migrant status (0="no" vs. 1="yes")                                      | 0.02            | -0.08          | <b>0.09*</b>   | 0.01           | -0.04           | 0.04           | -                                             |
| Minority status (0="no" vs. 1="yes")                                     | 0.01            | -0.06          | 0.04           | -0.02          | 0.04            | 0.01           | -                                             |



|                                                                    |                 |                 |                 |                 |                 |                 |   |
|--------------------------------------------------------------------|-----------------|-----------------|-----------------|-----------------|-----------------|-----------------|---|
| Number of minority group memberships                               | -0.02           | <b>-0.12*</b>   | 0.07            | -0.04           | 0.01            | -0.04           | - |
| Mental health diagnosis (0="yes", 1="no")                          | 0.01            | 0.01            | 0.02            | 0.11*           | -0.02           | -0.01           | - |
| <i>Perception of COVID risk</i>                                    |                 |                 |                 |                 |                 |                 |   |
| COVID anxiety                                                      | <b>0.24***</b>  | <b>0.15**</b>   | <b>0.36***</b>  | <b>0.21***</b>  | <b>0.35***</b>  | 0.03            | 4 |
| Close people have been infected                                    | <b>0.11***</b>  | -0.02           | <b>0.11*</b>    | 0.09            | <b>0.10*</b>    | -0.03           | 2 |
| Perceived risk of infection                                        | <b>0.19***</b>  | <b>0.16***</b>  | <b>0.23***</b>  | <b>0.19***</b>  | <b>0.28***</b>  | -0.05           | 4 |
| Expected consequences of infection                                 | <b>0.15***</b>  | <b>0.18***</b>  | <b>0.24***</b>  | <b>0.14**</b>   | <b>0.26***</b>  | -0.09           | 4 |
| <i>Political mindedness</i>                                        |                 |                 |                 |                 |                 |                 |   |
| Political orientation (higher values=more right-wing orientation)  | <b>-0.10***</b> | 0.01            | <b>-0.21***</b> | <b>-0.20***</b> | <b>-0.14**</b>  | <b>0.25***</b>  | 3 |
| Preferred sources of information (higher values=more social media) | <b>-0.14***</b> | <b>-0.24***</b> | <b>-0.15**</b>  | 0.02            | <b>-0.19***</b> | <b>-0.21***</b> | 4 |
| <i>Specific Mistrust</i>                                           |                 |                 |                 |                 |                 |                 |   |
| Pandemic persecutory threat (PPS)                                  | <b>0.06**</b>   | -0.03           | <b>0.12*</b>    | <b>0.20***</b>  | -0.06           | 0.04            | 2 |
| Pandemic paranoid conspiracy (PPS)                                 | <b>-0.39***</b> | <b>-0.53***</b> | <b>-0.34***</b> | <b>-0.21***</b> | <b>-0.49***</b> | <b>-0.38***</b> | 5 |
| Pandemic interpersonal mistrust (PPS)                              | <b>0.11**</b>   | 0.05            | <b>0.22***</b>  | <b>0.13**</b>   | 0.09            | -0.08           | 2 |

|                                      |                 |                 |                 |                 |                 |                 |   |
|--------------------------------------|-----------------|-----------------|-----------------|-----------------|-----------------|-----------------|---|
| Pandemic paranoia global score (PPS) | <b>-0.05*</b>   | <b>-0.18***</b> | 0.03            | <b>0.11*</b>    | <b>-0.19***</b> | -0.10           | 2 |
| Vaccine conspiracy beliefs           | <b>-0.56***</b> | <b>-0.68***</b> | <b>-0.57***</b> | <b>-0.49***</b> | <b>-0.64***</b> | <b>-0.41***</b> | 5 |
| <i>General mistrust</i>              |                 |                 |                 |                 |                 |                 |   |
| Ideas of reference (RGPTS)           | <b>-0.05*</b>   | <b>-0.16***</b> | 0.03            | 0.05            | -0.08           | -0.02           | 1 |
| Paranoid ideation (RGPTS)            | <b>-0.04</b>    | <b>-0.17***</b> | 0.04            | 0.00            | <b>-0.10*</b>   | 0.02            | 2 |
| General conspiracy mentality (CMQ)   | <b>-0.35***</b> | <b>-0.34***</b> | <b>-0.34***</b> | <b>-0.27***</b> | <b>-0.47***</b> | <b>-0.36***</b> | 5 |
| <i>Social adversity</i>              |                 |                 |                 |                 |                 |                 |   |
| Traumatic emotional neglect          | <b>0.08***</b>  | <b>0.10*</b>    | <b>0.11*</b>    | 0.05            | 0.08            | -0.02           | 2 |
| Traumatic psychological abuse        | <b>0.12***</b>  | <b>0.18***</b>  | <b>0.11*</b>    | <b>0.11*</b>    | <b>0.13**</b>   | 0.08            | 4 |
| Traumatic physical abuse             | <b>0.05*</b>    | 0.01            | 0.08            | <b>0.10*</b>    | <b>0.11*</b>    | -0.05           | 2 |
| Traumatic sexual abuse               | <b>0.08***</b>  | <b>0.12*</b>    | <b>0.10*</b>    | <b>0.10*</b>    | 0.07            | 0.08            | 3 |
| <i>Generalized beliefs</i>           |                 |                 |                 |                 |                 |                 |   |
| Negative beliefs about self (BCSS)   | <b>-0.10***</b> | <b>-0.15***</b> | <b>-0.13**</b>  | <b>-0.11*</b>   | -0.05           | -0.04           | 3 |
| Negative beliefs about others (BCSS) | <b>0.07***</b>  | <b>0.12*</b>    | <b>0.14**</b>   | <b>0.12*</b>    | 0.05            | <b>0.20***</b>  | 3 |
| Positive beliefs about self (BCSS)   | <b>-0.15***</b> | <b>-0.22***</b> | <b>-0.23***</b> | <b>-0.24***</b> | <b>-0.14**</b>  | 0.00            | 4 |
| Positive beliefs about others (BCSS) | <b>0.18***</b>  | <b>0.17***</b>  | <b>0.24***</b>  | <b>0.19***</b>  | <b>0.13**</b>   | <b>0.19**</b>   | 5 |

---

|                             |                |              |                |                |      |                |   |
|-----------------------------|----------------|--------------|----------------|----------------|------|----------------|---|
| Perceived social rank (SCS) | <b>0.11***</b> | <b>0.12*</b> | <b>0.17***</b> | <b>0.20***</b> | 0.07 | <b>0.21***</b> | 4 |
|-----------------------------|----------------|--------------|----------------|----------------|------|----------------|---|

---

Note: a) to avoid bias due to low cell counts the variables sex and gender were combined into a dichotomized variable to reflect the gender a participants most likely reads as at present, leading to a recoding for 16 participants (0.63%); b) educational level was dichotomized with GCSE or lower categorized as low educational level and everything else as high educational level; PPS = Pandemic Paranoia Scale; CMQ = Conspiracy Mentality Questionnaire; RGTPS = Revised Green Paranoid Thoughts Scale; Scale; BCSS = Brief Core Schema Scales; SCS = Social Comparison Scale. Significant results are printed in bold. Correlations printed in red show significant results with an opposite correlation when compared to the total sample.

### **Supplement 3. Hyperparameter tuning of the machine learning models**

#### **Strategy for hyperparameter tuning**

The hyperparameter tuning was conducted in a nested-cross-validation procedure with eight outer and four inner folds to identify the best hyperparameter configuration for each model. Due to the fact that classes were skewed we used random undersampling to prevent models potentially optimizing for the majority class. For the hyperparameter tuning we balanced classes on the whole dataset before starting the nested-cross-validation.

In nested cross-validation outer folds are split in training and testing folds. We split the training data of each outer fold in four inner folds consisting of a training and validation data set each. Hyperparameter configurations were cross validated in the inner folds and the best configuration in the inner fold was applied to the outer fold testing data. We used a randomized search over our hyperparameter space and optimized for the metric accuracy. Random forest classifiers could vary in their number of decision trees (50, 100, 200, 500, 1000, 1500), maximum depth of decision trees (5, 10, 15, 20, 25, 30, 35, 40, 45, 50, 55, 60, 65, 70, 75, 80, 85, 90, 95, 100, No restriction), maximum features allowed to use per split (20%, 40%, 60%, 80%), and the minimum samples required at each leaf node (10, 15, 20, 25, 30). Furthermore, we always used bootstrapping but varied the bootstrap sample size drawn from each training dataset (25%, 50%, 75%, 100%). Additionally, we pruned decision trees after calculation by varying the degree of model complexity penalization with the use of cost-complexity pruning (0.005, 0.01, 0.0125, 0.015, 0.0175). Our hyperparameter space resulted in 50400 possible configurations and we randomly searched 20% of this hyperparameter space (10080 configurations). Results of the hyperparameter tuning for all models are summarized in Table S2.

If multiple test folds yielded equal test accuracy we always chose the hyperparameter configuration with the least number of decision trees to optimize for speed of prediction as well. Following hyperparameter tuning, the leave-one-site-out and leave-one-person-out cross-

validation of the models with their respective best hyperparameter configuration was performed using random undersampling on each training fold before model calculation, whereas the test folds were based on the full data set.

**Table S3***Hyperparameter tuning results and final hyperparameter configuration for each model*

| Variables                                                                | Mean test accuracy | Mean training accuracy | Number of trees | Max. depth | Max. features per split | Min. samples per leaf | bootstrap | Ccp alpha |
|--------------------------------------------------------------------------|--------------------|------------------------|-----------------|------------|-------------------------|-----------------------|-----------|-----------|
| Standard model (without middle category)                                 |                    |                        |                 |            |                         |                       |           |           |
| All variables included                                                   | 82.35%             | 85.74%                 | 200             | 80         | 80%                     | 10                    | 100%      | 0.005     |
| Vaccination conspiracy belief excluded from model                        | 75.81%             | 82.22%                 | 100             | 30         | 80%                     | 10                    | 25%       | 0.005     |
| Specific/General mistrust excluded from model                            | 68.62%             | 75.85%                 | 1000            | 55         | 20%                     | 10                    | 100%      | 0.005     |
| Prediction using the most relevant variables                             |                    |                        |                 |            |                         |                       |           |           |
| 12 best variables                                                        | 82.27%             | 85.41%                 | 1500            | 35         | 80%                     | 10                    | 100%      | 0.005     |
| 7 best variables                                                         | 82.72%             | 84.95%                 | 500             | 100        | 20%                     | 10                    | 75%       | 0.005     |
| Model with middle category to not willing                                |                    |                        |                 |            |                         |                       |           |           |
| All variables included                                                   | 77.67%             | 80.26%                 | 500             | 10         | 80%                     | 10                    | 50%       | 0.005     |
| Model with middle category as separate class (Multi-label random forest) |                    |                        |                 |            |                         |                       |           |           |
| All variables included                                                   | 59.05%             | 70.21%                 | 200             | 70         | 40%                     | 10                    | 50%       | 0.005     |

*Note.* Ccp alpha = alpha value for cost-complexity pruning

#### **Supplement 4. Strategy for variable importance analyses**

We decided to use permutation feature importance because impurity-based feature importance measures have been shown to be biased<sup>47</sup> and permutation feature importance allowed us to investigate variable importance on the test dataset instead of on the training dataset. We used permutation feature importance for the site cross-validation analysis. Each variable of the testing data was permuted ten times. The accuracy of models was then re-evaluated with the permutation of each variable and the overall accuracy of each resulting model with permutation was juxtaposed with the original model. For each variable, a score of the mean of the 10 differences in accuracy between the original model and the model with one of the 10 permutations of this variable was calculated to estimate its importance in a given model in terms of reduction in model-accuracy without meaningful information from this variable.

To avoid any bias by relying solely on permutation feature importance for variable selection we additionally performed the calculation of SHapley Additive exPlanations (SHAP<sup>45</sup>) to compare whether most important variables mirrored the results of permutation feature importance. SHAP is an additive feature attribution method which has its theoretical basis in game theory and provides a model-agnostic approach to explain the output of machine learning models. Similar to our permutation feature importance analysis we calculated SHAP for each individual in the test folds of the leave-one-site-out cross validation analysis. For our analysis we used the treeSHAP<sup>48</sup> algorithm because it delivers fast and exact estimations of SHAP values for tree ensemble methods like random forests. To obtain a measure of global variable importance we then averaged the absolute SHAP values over all individuals to obtain a mean absolute SHAP value for each variable.

## Supplement 5 – descriptive values of all predictors

**Table S4**

*Mean values and standard deviations for all psychosocial predictors by site*

| Variables                                                          | UK<br>(n=512) |       | USA<br>(n=535) |       | AU<br>(n=502) |       | GE<br>(n=516) |       | HK<br>(n=445) |       |  |
|--------------------------------------------------------------------|---------------|-------|----------------|-------|---------------|-------|---------------|-------|---------------|-------|--|
|                                                                    | M/%           | SD    | M/%            | SD    | M/%           | SD    | M/%           | SD    | M/%           | SD    |  |
| <i>Perception of COVID risk</i>                                    |               |       |                |       |               |       |               |       |               |       |  |
| COVID anxiety                                                      | 57.00         | 28.08 | 53.63          | 32.80 | 51.93         | 29.46 | 58.66         | 29.56 | 55.98         | 24.29 |  |
| Close people have been infected                                    | 40.63%        | -     | 41.50%         | -     | 13.94%        | -     | 28.29%        | -     | 6.74%         | -     |  |
| Perceived risk of infection                                        | 4.82          | 2.25  | 4.02           | 2.55  | 4.03          | 2.79  | 4.76          | 2.50  | 4.06          | 2.25  |  |
| Expected consequences of infection                                 | 42.75         | 26.55 | 37.48          | 30.70 | 48.75         | 32.14 | 48.20         | 30.24 | 46.54         | 27.44 |  |
| <i>Political mindedness</i>                                        |               |       |                |       |               |       |               |       |               |       |  |
| Political orientation (higher values= more right-wing orientation) | 3.66          | 1.43  | 4.17           | 1.72  | 3.57          | 1.36  | 3.65          | 1.17  | 3.74          | 1.18  |  |
| Primary source of information (higher values=social media)         | 2.41          | 1.24  | 2.46           | 1.31  | 2.58          | 1.28  | 2.60          | 1.19  | 2.37          | 1.29  |  |
| <i>Specific Mistrust</i>                                           |               |       |                |       |               |       |               |       |               |       |  |
| Pandemic persecutory threat (PPS)                                  | 2.48          | 7.03  | 4.70           | 10.71 | 7.20          | 12.20 | 3.11          | 7.11  | 5.27          | 9.05  |  |
| Pandemic paranoid conspiracy (PPS)                                 | 3.85          | 3.22  | 3.48           | 3.44  | 4.10          | 3.25  | 2.93          | 3.01  | 3.52          | 2.73  |  |
| Pandemic interpersonal mistrust (PPS)                              | 3.66          | 4.83  | 4.71           | 5.92  | 5.50          | 5.94  | 4.05          | 5.20  | 6.01          | 5.36  |  |



|                                      |        |       |        |       |        |       |        |       |        |       |
|--------------------------------------|--------|-------|--------|-------|--------|-------|--------|-------|--------|-------|
| General pandemic paranoia (PPS)      | 6.68   | 9.05  | 9.09   | 12.97 | 12.18  | 14.60 | 6.94   | 9.07  | 10.42  | 11.15 |
| Vaccine conspiracy beliefs           | 16.32  | 11.39 | 20.55  | 12.77 | 22.41  | 12.31 | 18.62  | 11.83 | 19.91  | 11.30 |
| <i>General mistrust</i>              |        |       |        |       |        |       |        |       |        |       |
| Ideas of reference (RGPTS)           | 6.46   | 8.59  | 6.77   | 8.69  | 11.73  | 8.52  | 7.13   | 8.60  | 9.17   | 7.07  |
| Paranoid ideation (RGPTS)            | 6.03   | 9.66  | 6.85   | 10.42 | 12.01  | 11.02 | 5.72   | 9.11  | 8.52   | 9.67  |
| General conspiracy mentality (CMQ)   | 29.95  | 10.43 | 31.30  | 12.43 | 34.09  | 10.35 | 24.45  | 12.44 | 34.61  | 9.73  |
| <i>Social adversity</i>              |        |       |        |       |        |       |        |       |        |       |
| Traumatic emotional neglect          | 30.66% | -     | 33.64% | -     | 61.75% | -     | 44.19% | -     | 45.39% | -     |
| Traumatic psychological abuse        | 25.59% | -     | 34.95% | -     | 50.80% | -     | 36.82% | -     | 30.34% | -     |
| Traumatic physical abuse             | 20.90% | -     | 30.52% | -     | 39.64% | -     | 30.62% | -     | 12.41% | -     |
| Traumatic sexual abuse               | 18.16% | -     | 28.41% | -     | 38.84% | -     | 19.96% | -     | 17.08% | -     |
| <i>Generalized beliefs</i>           |        |       |        |       |        |       |        |       |        |       |
| Negative beliefs about self (BCSS)   | 2.92   | 4.70  | 2.60   | 4.73  | 5.35   | 5.81  | 3.29   | 4.85  | 3.48   | 5.31  |
| Negative beliefs about others (BCSS) | 4.52   | 5.83  | 5.76   | 6.79  | 6.63   | 6.97  | 5.55   | 5.96  | 2.88   | 5.17  |
| Positive beliefs about self (BCSS)   | 9.83   | 6.15  | 14.10  | 6.94  | 8.72   | 6.39  | 12.80  | 6.46  | 11.38  | 6.21  |
| Positive beliefs about others (BCSS) | 9.83   | 6.09  | 11.14  | 6.76  | 8.81   | 6.39  | 10.81  | 5.87  | 8.54   | 6.02  |
| Perceived social rank (SCS)          | 5.54   | 1.71  | 6.49   | 1.99  | 5.17   | 2.00  | 6.34   | 1.80  | 6.08   | 1.50  |

Note: PPS = Pandemic Paranoia Scale; CMQ = Conspiracy Mentality Questionnaire; RGPTS = Revised Green Paranoid Thoughts Scale; Scale; BCSS = Brief Core Schema Scales; SCS = Social Comparison Scale.

**Supplement 6 – Machine Learning models predicting vaccine willingness based on the full dataset including the mid-category of indecisive participants**

**Table S5**

*Cross-validation results for the machine learning model based on all variables in the full sample with indecisive participants labelled as vaccination hesitant*

| Cross validation                      | Sensitivity | PPV  | Specificity | NPV  | BAC  | TAC  |
|---------------------------------------|-------------|------|-------------|------|------|------|
| Leave-one-site-out cross validation   | 0.77        | 0.77 | 0.68        | 0.69 | 0.73 | 0.74 |
| Leave-one-person-out cross validation | 0.77        | 0.81 | 0.75        | 0.71 | 0.76 | 0.77 |

*Note.* PPV = positive predictive value, i.e. the frequency true positive tests among all positive tests; NPV = negative predictive value, i.e. the frequency true negative tests among all negative tests; BAC = balanced accuracy, i.e. the average of sensitivity and specificity; TAC = total unweighted.

**Table S6**

*Cross-validation results for multi-label random forest classifiers predicting answers for the leave-one-site-out and the leave-one-person-out cross-validation*

| Classification Category          | Cross validation on left-out site |           |      |      | Cross validation of left-out person |           |      |      |
|----------------------------------|-----------------------------------|-----------|------|------|-------------------------------------|-----------|------|------|
|                                  | Recall                            | Precision | BAC  | TAC  | Recall                              | Precision | BAC  | TAC  |
| Refusing to take a vaccine (1-2) | 0.65                              | 0.63      | 0.55 | 0.61 | 0.65                                | 0.64      | 0.59 | 0.64 |
| Indecisive (3)                   | 0.34                              | 0.22      |      |      | 0.42                                | 0.26      |      |      |
| Willing to take a vaccine (4-5)  | 0.67                              | 0.79      |      |      | 0.69                                | 0.84      |      |      |

*Note.* Recall = The frequency of correctly classified persons among all persons in the dataset with this class (similar to sensitivity); Precision = The frequency of correctly classified persons among all persons predicted as this class (similar to positive predictive value); BAC = balanced accuracy, i.e. the average of all recall values; TAC = total unweighted accuracy.
